1 For *PLoS ONE*, Research Article

2

3

4 **Sex differences in the immediate extinction deficit and renewal of**  
5 **extinguished fear in rats**

6

7

8 Annalise N. Binette<sup>¶</sup>, Michael S. Totty<sup>¶</sup>, and Stephen Maren<sup>1\*</sup>

9

10

11 Department of Psychological and Brain Sciences and Institute for Neuroscience, Texas A&M

12 University, College Station, Texas, United States of America

13

14

15 \* Corresponding author:

16 Email: [maren@tamu.edu](mailto:maren@tamu.edu) (SM)

17

18

19 <sup>¶</sup>These authors contributed equally

20

21

22 Key words: sex, extinction learning, fear, freezing, relapse, renewal, male, female, stress, rat

## 23 **Abstract**

24 Extinction learning is central to exposure-based behavioral therapies for reducing fear and anxiety  
25 in humans. However, patients with fear and anxiety disorders are often resistant to extinction.  
26 Moreover, trauma and stress-related disorders are highly prone to relapse and are twice as likely  
27 to occur in females compared to males, suggesting that females may be more susceptible to  
28 extinction deficits and fear relapse phenomena. In this report, we tested this hypothesis by  
29 examining sex differences in a stress-induced extinction learning impairment, the immediate  
30 extinction deficit (IED), and renewal, a common form of fear relapse. In contrast to our hypothesis,  
31 there were no sex differences in the magnitude of the immediate extinction deficit in two different  
32 rat strains (Long-Evans and Wistar). However, we did observe a sex difference in the renewal of  
33 fear when the extinguished conditioned stimulus was presented outside the extinction context.  
34 Male Wistar rats exhibited significantly greater renewal than female rats, a sex difference that has  
35 previously been reported after appetitive extinction. Collectively, these data reveal that stress-  
36 induced extinction impairments are similar in male and female rats, though the context-dependence  
37 of extinction is more pronounced in males.

38

## 39 **Introduction**

40 Clinical disorders caused by trauma exposure (e.g., post-traumatic stress disorder, PTSD) afflict  
41 millions of men and women in the United States every year [1]. Importantly, women are twice as  
42 likely as men to develop PTSD, suggesting that biological sex may influence the neural and  
43 behavioral processes underlying the pathophysiology of stress- and trauma-related disorders [2].  
44 Consistent with this, a substantial body of work has revealed sex differences in learning and

45 memory processes that may contribute to the development and maintenance of PTSD. For  
46 example, there are robust sex differences in Pavlovian fear conditioning in rats [3–5]. In this form  
47 of learning, a neutral conditioned stimulus (CS), such as an acoustic tone, is arranged to precede  
48 and predict a noxious unconditioned stimulus (US), such as an electric footshock. After as little as  
49 a single conditioning trial, presentation of the CS (or placement in the conditioning context) elicits  
50 anticipatory, conditioned fear responses (CRs), including freezing behavior [6–9]. Several studies  
51 have revealed that male rats exhibit greater acquisition of conditioned freezing to the  
52 environmental stimuli associated with shock (i.e., the conditioning context) relative to females  
53 [5,10–15], whereas freezing to discrete auditory CSs is similar in males and females [5,15,16].  
54 Interestingly, there are also sex differences in hippocampal and amygdala synaptic plasticity  
55 mechanisms thought to underlie these forms of learning [5,17]. These results suggest that sex  
56 differences in the neural and behavioral mechanisms of aversive learning and memory may  
57 contribute to the pathophysiology of PTSD.

58 Another form of learning implicated in the maintenance of PTSD is extinction. Extinction  
59 is a form of learning in which repeated non-reinforced presentations of a conditioned stimulus  
60 (CS) reduce the magnitude reduction of the CRs acquired during Pavlovian conditioning [18,19].  
61 Importantly, extinction is central to cognitive-behavioral therapies for PTSD, including prolonged  
62 exposure therapy [20]. In prolonged exposure therapy, trauma-related stimuli are repeatedly  
63 presented within a safe setting until those stimuli no longer elicit fear. Although extinction-based  
64 therapy can be highly effective at reducing pathological fear, the durability of extinction memory  
65 can be compromised by a variety of factors [21,22]. For instance, suppression of a CR after  
66 extinction is typically limited to the setting or context in which extinction learning occurred,  
67 resulting in renewal of the CR outside of the extinction context [23]. Furthermore, stress (acute or

68 chronic) can considerably reduce extinction learning and long-term retention, thereby fear relapse  
69 [24]. For example, the “immediate extinction deficit” (IED) occurs when extinction training is  
70 conducted shortly after fear conditioning (a stressor), rendering impairments in long-term  
71 extinction memory and relapse of conditioned fear [25,26]. Interestingly, immediate extinction  
72 occurs against the background of high levels of generalized contextual fear, which has been  
73 proposed to play an important role in the IED [26] (though see [27]).

74         Although extinction learning plays a central role in behavioral therapies for trauma- and  
75 stressor-related disorders, the interaction of sex differences in contextual fear conditioning, on the  
76 one hand, with extinction learning and memory, on the other, is unclear. In addition to sex  
77 differences in contextual fear conditioning, there is considerable evidence that stress-related neural  
78 circuitry in females are more sensitive to those in males [28–31]. These sex differences might  
79 make females more susceptible to stress-induced extinction learning impairments, such as the IED.  
80 Moreover, sex differences in contextual conditioning and stress responsivity might influence the  
81 relapse of extinguished fear, including renewal. Therefore, in this study, we characterized the IED  
82 in male and female rats using two common laboratory rat strains (Long Evans and Wistar) and  
83 standard Pavlovian fear conditioning and extinction procedures. Surprisingly, we found that there  
84 was no sex difference in the IED in either rat strain; both male and female rats exhibited poor  
85 extinction retention relative to animals undergoing delayed extinction and exhibited similar levels  
86 of conditioned freezing compared with non-extinguished controls. In contrast, male Wistar rats  
87 showed greater renewal of fear to an extinguished CS in a novel context compared to females. Sex  
88 differences in renewal were not due to greater contextual fear in male rats. These results reveal  
89 that male and female rats are similarly susceptible to stress-induced extinction impairments, but  
90 that males may be more susceptible to fear renewal.

91

## 92 **Materials and methods**

### 93 **Ethics statement**

94 This study was carried out in strict accordance with the recommendations of the National Institutes  
95 of Health and Texas A&M University. These experiments were approved by the Texas A&M  
96 University Animal Care and Use Committee (Animal Use Protocol Number: 2020-0305).

### 97 **Subjects**

98 A total of 64 adult female and male Long-Evans and Wistar rats were used in this study. Long-  
99 Evans Blue Spruce rats (male, n = 16; female, n = 16) were obtained from Envigo (Indianapolis,  
100 IN) and weighed 200-224 g upon arrival. Wistar rats (male, n = 16; female, n = 16) were bred in-  
101 house; they were 11-16 weeks of age upon behavioral testing. The Wistar rats used in this study  
102 were derived from *Crh*-Cre rats [32] obtained from the laboratory of Robert Messing at the  
103 University of Texas at Austin. These rats were bred in our laboratory with commercially  
104 supplied wild-type Wistar rats (Envigo, Indianapolis, IN). The Wistar rats were genotyped and  
105 randomly assigned to groups (extinction type) within each litter; both Cre<sup>+</sup> and Cre<sup>-</sup> rats were  
106 included in the experiments and their behavior was identical. All rats were individually housed in  
107 a temperature- and humidity-controlled vivarium, with a 14:10 hour light/dark cycle and ad  
108 libitum access to food and water. Behavioral testing was conducted during the light phase. Rats  
109 were handled 1 minute per day for 5 days prior to testing to acclimate them to the experimenter.

### 110 **Procedure**

111 All behavioral procedures took place in a standard rodent conditioning chamber with two  
112 aluminum walls, two Plexiglas walls and a Plexiglas ceiling (Med Associates, St. Albans, VT).

113 The chamber was outfitted with a speaker mounted to the upper corner of one wall for delivery of  
114 auditory stimuli. The grid floor was composed of stainless-steel rods for delivery of scrambled  
115 footshock. Load-cell force transducers located underneath each chamber measured displacement  
116 of the chamber in response to motor activity; these voltages ( $\pm 10$  V) were acquired at 5 Hz and  
117 transformed to absolute values (scale of 0-100). A freezing bout was defined as five consecutive  
118 values below 10 (freezing threshold, corresponding to one second of freezing).

119 To assess the IED, we conducted separate experiments in Long-Evans and Wistar rats. In  
120 the first experiment, male and female Long-Evans rats underwent either immediate or delayed  
121 extinction after auditory fear conditioning. Extinction was followed by a retention test conducted  
122 24 hours later. All the behavioral procedures were conducted in the same context (Context A).  
123 Animals were transported from the vivarium to the laboratory in black plastic boxes. A metal pan  
124 beneath the grid floor of each conditioning chamber was cleaned with a 1% ammonium solution.  
125 The room housing the conditioning chambers was illuminated with red light and fans affixed to  
126 each chamber were turned on. Doors of the outer sound attenuating cabinets were closed.  
127 Conditioning consisted of a 3-min baseline period followed by 5 CS-US pairings. The CS was a  
128 10-s white noise (80 dB) paired with a 2-s, 1-mA footshock unconditioned stimulus (US). The  
129 intertrial interval (ITI) was 70 seconds. After conditioning, animals were placed in the transport  
130 boxes and returned to the vivarium unless undergoing immediate extinction, in which case they  
131 remained in the transport boxes until the immediate extinction session began. Either 15-min or 24-  
132 hr later, the animals were returned to the conditioning chambers for immediate or delayed  
133 extinction, respectively. Extinction consisted of a 3-min baseline period followed by 45 CS-alone  
134 presentations (40-s ITI). All animals were returned to the chamber again 48-hr after conditioning  
135 for a retrieval test consisting of a second extinction session.

136 In the second experiment, we examined the IED in Wistar rats. Because the IED has not  
137 previously been studied in Wistar rats, we used a no-extinction control similar to our previously  
138 published work in Long-Evans rats [25]. The conditioning procedures were identical to those used  
139 for the Long-Evans rats, except for the use of a stronger footshock US (2 mA). After conditioning,  
140 animals received either an immediate or delayed extinction procedure or were simply placed in the  
141 conditioning chambers (no-extinction control); extinction retrieval testing was conducted 48 hours  
142 after. Conditioning and extinction procedures were conducted in Context A. After the retrieval  
143 test, all animals underwent a second extinction session (re-extinction) then were randomly  
144 assigned to a retrieval test (5 CS-only presentations) in either Context A (SAME, the extinction  
145 context) or Context B (DIFF, a novel context). Animals tested in Context B were transported from  
146 the vivarium to the laboratory in white transport boxes. For Context B, the conditioning chambers  
147 had a metal pan beneath the grid floor that was cleaned with a 3% acetic acid solution, and the  
148 room was illuminated with standard white light. Fans affixed to the sound attenuating cabinets  
149 were turned off and doors to the cabinets were left open.

## 150 **Statistics**

151 Data were analyzed with StatView software (SAS Institute). Results are displayed as mean  $\pm$   
152 standard error the mean (SEM). Analysis of variance (ANOVA) was used to assess percentage of  
153 time freezing with repeated measures of trial ( $\alpha = 0.05$ ).

154

## 155 **Results**

### 156 **Both male and female rats display the immediate extinction deficit**

157 We first sought to determine if both male and female rats are similarly susceptible to the IED, a  
158 stress-induced extinction impairment (Fig 1A). To this end, Long-Evans rats underwent standard  
159 auditory fear conditioning which consisted of 5 CS-footshock (US) pairings. All rats acquired fear  
160 to the CS [main effect of Trials:  $F_{5, 135} = 99.8, p < .0001$ ] and there were no differences between  
161 males and females [no main effect of Sex:  $F_{1, 27} = 0.60, p = 0.45$ ; Trials x Sex interaction:  $F_{5, 135} =$   
162  $0.46, p = .81$ ] (Fig 1B; Conditioning). Rats next underwent fear extinction either 15 minutes  
163 (Immediate) or 24 hours (Delayed) later in the same context, which consisted of 45 CS-alone trials.  
164 We found that rats extinguished immediately following fear conditioning showed impaired within-  
165 session extinction compared to animals extinguished 24 hours later [main effect of Ext Type:  $F_{1, 27} = 6.21, p = 0.02$ ;  
166 Trials x Ext Type interaction:  $F_{9, 243} = 2.87, p = 0.003$ ] (Fig 1B; Extinction).  
167 Forty-eight hours after conditioning, all animals were brought back to the extinction context and  
168 tested for extinction memory with another 45 CS-alone trials. During retrieval, both groups froze  
169 at similar levels to the first five trials, however, following this the Delayed animals reduced their  
170 freezing, demonstrating good extinction memory, while high freezing in the Immediate group  
171 persisted [Trials x Ext Type interaction:  $F_{8, 216} = 2.90, p = .004$ ] (Fig 1B; Retrieval). Importantly,  
172 although females showed a slightly faster reduction in freezing compared to males [ $F_{8, 216} = 1.72,$   
173  $p = 0.09$ ], the immediate extinction procedure produced a similar deficit in extinction retention in  
174 both male and female rats [Trials x Ext Type x Sex interaction:  $F_{8, 216} = 0.274, p = 0.97$ ]. These  
175 data suggest that male and female Long-Evans rats are similarly susceptible to the immediate  
176 extinction deficit.

177

178 **Fig 1. Male (♂□) and female (♀□) Long-Evans exhibit the IED. (A)** Behavioral timeline for  
179 the different experimental groups. **(B)** Freezing data show that Long-Evans rats acquired



180 equivalent levels of conditional fear to the auditory CS (Conditioning). Both Immediate and  
181 Delayed groups showed a marked reduction in fear to the CS throughout fear extinction, with  
182 Delayed animals showing lower levels of fear at the end of extinction training (Extinction).  
183 Although all groups of animals showed equivalent levels of fear early in the retrieval test (Block  
184 1), immediately extinguished animals demonstrated a reduced rate of re-extinction compared to  
185 Delayed animals, indicative of impaired extinction memory (Retrieval). This IED was similar  
186 between male and females, though, females showed faster rate of re-extinction compared to males  
187 in both groups. All error bars represent  $\pm$  SEM.

188

189         There are some inconsistencies in the reported findings of sex differences in learning and  
190 memory paradigms and it has been suggested that some of these findings may be strain specific  
191 [33]. We thus sought to replicate the above findings using a different strain of rats, while adding  
192 control groups that do not undergo fear extinction (Fig 2A). Equal numbers of Cre<sup>+</sup> and Cre<sup>-</sup> male  
193 and female Wistar rats (see the *Materials and Methods* section for more detail) were used for the  
194 following experiments. Throughout all statistical comparisons, we observed no significant effects  
195 of genotype and thus chose to collapse data across genotype to improve statistical power. All rats  
196 were first conditioned as previously described and all rats developed conditional responding to the  
197 CS [main effect of Trials:  $F_{5, 140} = 50.24, p < 0.0001$ ] (Fig 2B). Female rats showed slightly higher  
198 freezing compared to males [main effect of Sex:  $F_{1, 28} = 8.65, p < 0.0065$ ] and, although Immediate  
199 and Delayed groups displayed slightly different learning curves [Trial x Ext Type interaction:  $F_{5, 140} = 5.01, p = 0.0003$ ], they displayed equivalent total amounts of freezing [no main effect of Ext  
200 Type:  $F_{1, 28} = 0.02, p = 0.90$ ] (Fig 2B). Following conditioning, rats either underwent extinction  
201 15 minutes (Immediate-Ext) or 24 hours (Delayed-Ext) after conditioning, or they were merely re-

203 exposed to the context 15 minutes (Immediate-NoExt) or 24 later hours (Delayed-NoExt) (Fig  
204 2A). Although female rats showed more freezing during conditioning, we did not observe any sex  
205 differences during extinction [no main effect of Sex:  $F_{1,24} = 0.03, p = 0.86$ ; Block x Sex interaction:  
206  $F_{9,216} = 0.61, p = 0.79$ ; Ext Type x Sex interaction:  $F_{1,24} = 0.61, p = 0.44$ ; or Block x Ext Type x  
207 Sex interaction:  $F_{9,216} = 0.76, p = 0.66$ ]. Animals that underwent extinction showed very high  
208 levels of CS-evoked freezing compared to control animals that were exposed to the context [main  
209 effect of Ext:  $F_{1,24} = 68.38, p < 0.0001$ ; Block x Ext interaction:  $F_{9,216} = 17.21, p < 0.0001$ ] (Fig  
210 2C-D). Like the previous experiment, all groups showed equally high freezing during the first 5  
211 trials of retrieval testing; however, delayed extinction animals exhibited a clear decrease in  
212 freezing in the second block of 5 trials whereas high freezing persisted in all other groups [Block  
213 x Ext x Ext Type interaction:  $F_{8,192} = 3.50, p = 0.0009$ ] (Fig 2C-D). This effectively demonstrates  
214 that undergoing extinction training immediately following conditioning impairs extinction  
215 retention to that of animals that never underwent extinction at all. Importantly, we once again show  
216 no sex differences in the IED when comparing across extinction groups [no Block x Ext x Ext  
217 Type x Sex interaction:  $F_{8,192} = 1.88, p = 0.065$ ] or in any other comparison during retrieval testing  
218 (all  $p$ -values  $> .09$ ). Collectively, we show that male and female rats, across strains, are equally  
219 susceptible to stress-induced extinction impairments.

220

221 **Fig 2. Male ( $\sigma^{\square}$ ) and female ( $\text{♀}^{\square}$ ) Wistar rats exhibit an IED. (A)** Behavioral timeline for the  
222 different experimental groups. **(B)** All groups acquired similar levels of conditioned freezing prior  
223 to extinction. **(C)** Wistar rats that underwent extinction training showed a reduction in fear across  
224 extinction trials with immediately extinguished rats reaching lower levels of freezing than delayed  
225 animals. Despite this, immediate extinction animals still showed impaired extinction during

226 retrieval testing as indicated by reduced rate of re-extinction. This effect was similar in both males  
227 and females. **(D)** Comparatively, No-Extinction animals exhibited high levels of conditioned  
228 freezing during retrieval testing that was similar among all groups. All error bars represent  $\pm$  SEM.

229

## 230 **Male, but not female, rats exhibit renewal of extinguished fear**

231 Similar to stress-induced impairments in extinction learning, contextual processing is thought to  
232 be central to trauma-related disorders such as PTSD [34,35]. Previous work has demonstrated sex  
233 differences in the renewal of extinguished CRs after appetitive conditioning [36], however, it is  
234 currently unknown if this is true for aversively conditioned CSs. To test this, Wistar rats from the  
235 previous experiment underwent an additional extinction session to completely extinguish any  
236 remaining fear (Fig 3). The animals were then reassigned to new groups for renewal testing and  
237 were counterbalanced for previous group assignments. After the second extinction session, male  
238 and female rats were either placed back into the extinction context (A; retrieval context) or they  
239 were placed into a novel context (B; renewal context) where they were presented 5 CS-alone trials.  
240 During the second extinction session all rats showed moderate levels of fear during the first five-  
241 trial block but quickly reduced freezing to baseline levels [main effect of trials:  $F_{9,252} = 34.09, p <$   
242  $0.0001$ ], and there were no sex or group differences during extinction [Trials x Sex interaction:  
243  $F_{9,252} = 1.579, p = 0.12$ ; Trials x Context interaction:  $F_{9,252} = 1.169, p = 0.32$ ; Trials x Sex x Context  
244 interaction:  $F_{9,252} = 0.654, p = 0.75$ ] (Fig 3; Extinction II). During testing, both male and female  
245 rats placed back into the extinction context showed very low levels of freezing. However, males,  
246 but not females, placed into the novel context showed a renewal of conditioned freezing [Trials x  
247 Sex x Context interaction:  $F_{5,140} = 2.60, p = 0.028$ ], particularly during the first two trials (Fig 3;  
248 Renewal Test). These data demonstrate that female rats do not display renewal of freezing to an

249 extinguished aversive CS. We suggest that differences in the contextual regulation of aversive  
250 memory such as these may underlie susceptibilities to anxiety- and trauma-based disorders.

251

252 **Fig 3. Male (♂) but not female (♀) Wistar rats exhibit renewal of extinguished fear.**

253 Freezing data showing that male and female Wistar rats displayed similar levels of fear during a  
254 second extinction session after the prior extinction retrieval test (left). However, only male rats  
255 displayed fear renewal the following day when presented the extinguished CS in a novel context  
256 (DIFF, right) relative to animals tested in the extinction context (SAME). This was particularly  
257 evident during the first two trials of testing. All error bars represent  $\pm$  SEM.

258

## 259 **Discussion**

260 In this study we investigated sex differences in failures of extinction learning and retrieval. We  
261 found that male and female rats are equally susceptible to the IED—a stress-induced extinction  
262 impairment—in two different strains of animals. Interestingly, we also show that females, but not  
263 males, exhibit impairments in the renewal of extinguished fear, suggestive of a sex difference in  
264 contextual processing. This finding is in line with previous work showing sex differences in the  
265 renewal of appetitive conditioning [36]. Our work extends previous literature and suggests that  
266 differences in contextual processing may be a critical factor accounting for the disparity in  
267 susceptibility for stress and trauma-related disorders across sexes.

268 Although both male and female rats show comparable deficits in immediate extinction,  
269 female rats showed a more rapid (but non-significant) reduction in conditioned freezing during  
270 retrieval testing, regardless of the extinction procedure (immediate or delayed). It is unlikely that  
271 this rate difference is a consequence of sex differences in conditioning insofar as Long-Evans rats

272 showed no sex differences in conditioning, whereas Wistar females showed greater levels of  
273 freezing during conditioning. A potential explanation for sex differences in the (re)extinction of  
274 fear is estrous cycle phase. For example, extinction is impaired in females that undergo extinction  
275 training during metestrus but enhanced in females trained in estrus or proestrus [37]. Ovarian  
276 steroids underlie the more rapid reduction in freezing during extinction retrieval in females [38,39],  
277 which was observed under both low- and high-stress conditions. This suggests that stress does not  
278 block the adaptive effects of high estrogen and progesterone on retrieval facilitation. From another  
279 perspective, however, changes in hormonal state across extinction training and retrieval testing in  
280 females might be expected to impair extinction retrieval and facilitate renewal because extinction  
281 retrieval is highly context-dependent [23]. Yet the opposite was true: female rats showed superior  
282 extinction retrieval and did not exhibit renewal (at least in Wistar rats). It would be important in  
283 future work to examine the role that estrous cycle and gonadal steroids may play in these processes.

284         Given that the IED is a stress-induced deficit driven by the locus coeruleus (LC) [26,40,41],  
285 a sexually-dimorphic structure [28], it is perhaps surprising that we did not observe sex differences  
286 in the IED. Recent work has revealed that the IED is driven by LC-derived norepinephrine (LC-  
287 NE) which excites neurons in the basolateral nucleus of the amygdala (BLA) [40,42,43] and, in  
288 turn, impairs the infralimbic (IL) division of the medial prefrontal cortex [44–46]. The IL is critical  
289 to the formation of long-term extinction memories [47–49]. Although LC-NE release within the  
290 prefrontal cortex enhances arousal and is necessary for successful extinction learning [50], high  
291 levels of LC-NE may act to impair prefrontal function [40,51]. Substantial work has demonstrated  
292 that LC neurons in females compared to males are genetically distinct [52], have greater dendritic  
293 morphology [53], and are 10-30x more sensitive to activation by corticotropin-releasing factor  
294 (CRF), irrespective of cycling hormones [54]. Moreover, the central nucleus of the amygdala

295 (CeA) is a large source of CRF input that is directly excitatory to LC-NE neurons [55–59], and  
296 CeA CRF<sup>+</sup> cells have recently been shown to be necessary and sufficient to drive the IED [60].  
297 All of this would suggest that females should be highly susceptible to stress-induced extinction  
298 impairments. Nonetheless, it has also been found that prior stress sensitizes LC neurons in male  
299 rats [61,62], but not females, which abolishes sex differences in LC sensitivity [54]. Thus, we  
300 suggest that high levels of physiological stress (such as that from fear conditioning) may result in  
301 a ceiling effect such that male and female rats are equally susceptible to stress-induced  
302 impairments in extinction learning. Given this, it would be worthwhile to know if female rats are  
303 susceptible to the IED under conditions that are typically not stressful enough to cause extinction  
304 impairments in male rats, such as weaker shocks or fewer conditioning trials [40,63]. Although  
305 acute stress from fear conditioning in rodents does not appear to result in obvious sex differences  
306 in the IED procedure, it is still possible that the wide-range of sex differences in the LC-NE system  
307 plays a central role in the development of chronic stress and/or psychiatric disorder, such as PTSD,  
308 in humans.

309 Our finding that male, but not female, rats exhibit renewal of extinguished fear mirrors  
310 work in both appetitive and aversive conditioning [36,64]. Anderson and Petrovich (2015)  
311 investigated the renewal of food seeking using an ABA design in Long-Evans rats and found that  
312 male, but not female, renewed previously extinguished conditional responding to the food cup  
313 when tested outside of the extinction context [36]. They additionally found that renewal returned  
314 in ovariectomized female rats that received estradiol replacement throughout behavioral training  
315 and testing, but not in ovariectomized females without estradiol replacement. This suggests that  
316 levels of estradiol may play a critical role in renewal in female rats [36]. Contrary to this, Hilz and  
317 colleagues have shown that renewal in females only occurs when they are extinguished in the

318 proestrous phase (high levels of estrogen) and tested in metestrous/diestrous phase (low levels of  
319 estrogen), suggesting that renewal in intact females relies on a shift in interoceptive hormonal state  
320 [65,66]. Further adding to this theory, Park and colleagues show that female rats display renewal  
321 at a juvenile age (P18) before hormone cycling begins [67,68]. In aversive conditioning, estrous  
322 cycle phase has been shown to modulate fear renewal in female rats. Female rats that undergo  
323 auditory fear extinction during metestrus and diestrus, but not in proestrus and estrus, show fear  
324 renewal to the CS in a novel context [64]. Taken together, we suggest that renewal in female rats  
325 depends heavily on both interoceptive and exteroceptive context.

326         Interestingly, a previous report found that adult female rats did exhibit fear renewal when  
327 freezing in an alternate context is compared to the last five trials of extinction from the previous  
328 day [69]. This is more akin to a different form of fear relapse called spontaneous recovery [70].  
329 Moreover, the within-subjects comparison for extinction retrieval was conducted one hour after  
330 renewal testing in all animals allowing for the possibility that renewal testing further extinguished  
331 animals prior to retrieval testing [69]. Collectively, there is still much work to be done to determine  
332 the factors that regulate sex differences in fear relapse after extinction.

333         Indeed, sex differences in brain areas critical for the context-dependence of extinction may  
334 underlie differences in renewal. The hippocampal formation encodes and transmits spatial  
335 information to various limbic regions, including the mPFC and amygdala, primarily through its  
336 ventral subregion (vHPC) that is critical for guiding contextually appropriate behaviors. The vHPC  
337 sends monosynaptic projections to the lateral and central nuclei of the amygdala [71,72], and a  
338 dense feedforward inhibitory circuit to the mPFC [73,74], each of which have been implicated in  
339 context-dependent fear renewal. Appetitive renewal similarly involves the activation of mPFC-  
340 projecting vHPC neurons [75], modulation of the mPFC [76,77], and amygdala activation

341 [65,66,77]. Interestingly, sex differences in the recruitment of these neural circuits mirrored the  
342 behavioral sex differences seen in appetitive renewal [65,66,75–77]. It seems likely that the failure  
343 to recruit these circuits when confronted with an extinguished CS outside of the extinction context  
344 underlies impaired renewal often observed in female rats.

345 In summary, we first show that both male and female rats are equally susceptible to the  
346 IED despite well-known sex differences in the neural circuits underlying the IED. We speculate  
347 that enhanced basal excitability of the LC-NE system in females may result in increased  
348 susceptibility to mild stressors compared to male rats, whereas strong acute stressors result in the  
349 sensitization of the male LC-NE system, abolishing potential sex differences in extinction learning.  
350 We next show that female rats do not display context-mediated fear renewal, similar to reports in  
351 appetitive literature. We argue that renewal of conditional responding in female rats may depend  
352 heavily on interoceptive, in addition to exteroceptive, contexts. Changes in interoceptive context  
353 are monitored by the insular cortex [78], and it's possible that insular projections to the amygdala  
354 and para-hippocampal regions may gate the renewal of extinguished fear. Alternatively, cycling  
355 hormones such as estradiol may modulate the excitability of limbic circuits underlying renewal.

356

357

358

359

360

361

362



## 363 **References**

- 364 1. Kessler RC, Petukhova M, Sampson NA, Zaslavsky AM, Wittchen H-U. Twelve-month  
365 and lifetime prevalence and lifetime morbid risk of anxiety and mood disorders in the  
366 United States. *Int J Methods Psychiatr Res.* 2012;21: 169–184. doi:10.1002/mpr.1359
- 367 2. Steel Z, Marnane C, Iranpour C, Chey T, Jackson JW, Patel V, et al. The global  
368 prevalence of common mental disorders: a systematic review and meta-analysis 1980-  
369 2013. *Int J Epidemiol.* 2014;43: 476–493. doi:10.1093/ije/dyu038
- 370 3. Dalla C, Shors TJ. Sex differences in learning processes of classical and operant  
371 conditioning. *Physiol Behav.* 2009;97: 229–238. doi:10.1016/j.physbeh.2009.02.035
- 372 4. Day HLL, Stevenson CW. The neurobiological basis of sex differences in learned fear  
373 and its inhibition. *Eur J Neurosci.* 2020;52: 2466–2486. doi:10.1111/ejn.14602
- 374 5. Maren S, De Oca B, Fanselow MS. Sex differences in hippocampal long-term  
375 potentiation (LTP) and Pavlovian fear conditioning in rats: positive correlation between  
376 LTP and contextual learning. *Brain Res.* 1994;661: 25–34. doi:10.1016/0006-  
377 8993(94)91176-2
- 378 6. Pavlov PI. Conditioned reflexes: An investigation of the physiological activity of the  
379 cerebral cortex. *Ann Neurosci.* 1927;17: 136–141. doi:10.5214/ans.0972-7531.1017309
- 380 7. Maren S. Neurobiology of Pavlovian fear conditioning. *Annu Rev Neurosci.* 2001;24:  
381 897–931. doi:10.1146/annurev.neuro.24.1.897
- 382 8. Fendt M, Fanselow MS. The neuroanatomical and neurochemical basis of conditioned  
383 fear. *Neurosci Biobehav Rev.* 1999;23: 743–760. doi:10.1016/S0149-7634(99)00016-0
- 384 9. LeDoux JE. Emotion circuits in the brain. *Annu Rev Neurosci.* 2000;23: 155–184.  
385 doi:10.1146/annurev.neuro.23.1.155
- 386 10. Wiltgen BJ, Sanders MJ, Behne NS, Fanselow MS. Sex differences, context preexposure,  
387 and the immediate shock deficit in Pavlovian context conditioning with mice. *Behav*  
388 *Neurosci.* 2001;115: 26–32. doi:10.1037/0735-7044.115.1.26
- 389 11. Gresack JE, Schafe GE, Orr PT, Frick KM. Sex differences in contextual fear  
390 conditioning are associated with differential ventral hippocampal extracellular signal-  
391 regulated kinase activation. *Neuroscience.* 2009;159: 451–467.  
392 doi:10.1016/j.neuroscience.2009.01.009
- 393 12. Ribeiro AM, Barbosa FF, Godinho MR, Fernandes VS, Munguba H, Melo TG, et al. Sex  
394 differences in aversive memory in rats: possible role of extinction and reactive emotional  
395 factors. *Brain Cogn.* 2010;74: 145–151. doi:10.1016/j.bandc.2010.07.012

- 396 13. Daviu N, Andero R, Armario A, Nadal R. Sex differences in the behavioural and  
397 hypothalamic-pituitary-adrenal response to contextual fear conditioning in rats. *Horm*  
398 *Behav.* 2014;66: 713–723. doi:10.1016/j.yhbeh.2014.09.015
- 399 14. Colon L, Odynocki N, Santarelli A, Poulos AM. Sexual differentiation of contextual fear  
400 responses. *Learn Mem.* 2018;25: 230–240. doi:10.1101/lm.047159.117
- 401 15. Cossio R, Carreira MB, Vásquez CE, Britton GB. Sex differences and estrous cycle  
402 effects on foreground contextual fear conditioning. *Physiol Behav.* 2016;163: 305–311.  
403 doi:10.1016/j.physbeh.2016.05.026
- 404 16. Totty MS, Warren N, Huddleston I, Ramanathan KR, Ressler RL, Oleksiak CR, et al.  
405 Behavioral and brain mechanisms mediating conditioned flight behavior in rats. *Sci Rep.*  
406 2021;11: 8215. doi:10.1038/s41598-021-87559-3
- 407 17. Blume SR, Freedberg M, Vantrease JE, Chan R, Padival M, Record MJ, et al. Sex- and  
408 Estrus-Dependent Differences in Rat Basolateral Amygdala. *J Neurosci.* 2017;37: 10567–  
409 10586. doi:10.1523/JNEUROSCI.0758-17.2017
- 410 18. Bouton ME. Context and behavioral processes in extinction. *Learn Mem.* 2004;11: 485–  
411 494. doi:10.1101/lm.78804
- 412 19. Bouton ME, Maren S, McNally GP. Behavioral and neurobiological mechanisms of  
413 pavlovian and instrumental extinction learning. *Physiol Rev.* 2021;101: 611–681.  
414 doi:10.1152/physrev.00016.2020
- 415 20. VanElzaker MB, Dahlgren MK, Davis FC, Dubois S, Shin LM. From Pavlov to PTSD:  
416 the extinction of conditioned fear in rodents, humans, and anxiety disorders. *Neurobiol*  
417 *Learn Mem.* 2014;113: 3–18. doi:10.1016/j.nlm.2013.11.014
- 418 21. Goode TD, Maren S. Animal models of fear relapse. *ILAR J.* 2014;55: 246–258.  
419 doi:10.1093/ilar/ilu008
- 420 22. Bouton ME. Context, ambiguity, and unlearning: sources of relapse after behavioral  
421 extinction. *Biol Psychiatry.* 2002;52: 976–986. doi:10.1016/s0006-3223(02)01546-9
- 422 23. Bouton ME, Bolles RC. Contextual control of the extinction of conditioned fear. *Learn*  
423 *Motiv.* 1979;10: 445–466. doi:10.1016/0023-9690(79)90057-2
- 424 24. Maren S, Holmes A. Stress and fear extinction. *Neuropsychopharmacology.* 2016;41: 58–  
425 79. doi:10.1038/npp.2015.180
- 426 25. Maren S, Chang C. Recent fear is resistant to extinction. *Proc Natl Acad Sci USA.*  
427 2006;103: 18020–18025. doi:10.1073/pnas.0608398103

- 428 26. Maren S. Nature and causes of the immediate extinction deficit: a brief review. *Neurobiol*  
429 *Learn Mem.* 2014;113: 19–24. doi:10.1016/j.nlm.2013.10.012
- 430 27. Merz CJ, Wolf OT. The immediate extinction deficit occurs in a nonemotional learning  
431 paradigm. *Learn Mem.* 2019;26: 39–45. doi:10.1101/lm.048223.118
- 432 28. Bangasser DA, Cuarenta A. Sex differences in anxiety and depression: circuits and  
433 mechanisms. *Nat Rev Neurosci.* 2021;22: 674–684. doi:10.1038/s41583-021-00513-0
- 434 29. Bangasser DA, Wiersielis KR, Khantsis S. Sex differences in the locus coeruleus-  
435 norepinephrine system and its regulation by stress. *Brain Res.* 2016;1641: 177–188.  
436 doi:10.1016/j.brainres.2015.11.021
- 437 30. Bangasser DA, Wiersielis KR. Sex differences in stress responses: a critical role for  
438 corticotropin-releasing factor. *Hormones (Athens).* 2018;17: 5–13. doi:10.1007/s42000-  
439 018-0002-z
- 440 31. Bale TL, Epperson CN. Sex differences and stress across the lifespan. *Nat Neurosci.*  
441 2015;18: 1413–1420. doi:10.1038/nn.4112
- 442 32. Pomrenze MB, Millan EZ, Hopf FW, Keiflin R, Maiya R, Blasio A, et al. A transgenic  
443 rat for investigating the anatomy and function of corticotrophin releasing factor circuits.  
444 *Front Neurosci.* 2015;9: 487. doi:10.3389/fnins.2015.00487
- 445 33. Colom-Lapetina J, Begley SL, Johnson ME, Bean KJ, Kuwamoto WN, Shansky RM.  
446 Strain-dependent sex differences in a long-term forced swim paradigm. *Behav Neurosci.*  
447 2017;131: 428–436. doi:10.1037/bne0000215
- 448 34. Liberzon I, Abelson JL. Context Processing and the Neurobiology of Post-Traumatic  
449 Stress Disorder. *Neuron.* 2016;92: 14–30. doi:10.1016/j.neuron.2016.09.039
- 450 35. Maren S, Phan KL, Liberzon I. The contextual brain: implications for fear conditioning,  
451 extinction and psychopathology. *Nat Rev Neurosci.* 2013;14: 417–428.  
452 doi:10.1038/nrn3492
- 453 36. Anderson LC, Petrovich GD. Renewal of conditioned responding to food cues in rats:  
454 Sex differences and relevance of estradiol. *Physiol Behav.* 2015;151: 338–344.  
455 doi:10.1016/j.physbeh.2015.07.035
- 456 37. Milad MR, Igoe SA, Lebron-Milad K, Novales JE. Estrous cycle phase and gonadal  
457 hormones influence conditioned fear extinction. *Neuroscience.* 2009;164: 887–895.  
458 doi:10.1016/j.neuroscience.2009.09.011
- 459 38. Gupta RR, Sen S, Diepenhorst LL, Rudick CN, Maren S. Estrogen modulates sexually  
460 dimorphic contextual fear conditioning and hippocampal long-term potentiation (LTP) in  
461 rats. *Brain Res.* 2001;888: 356–365.

- 462 39. Nagaya N, Acca GM, Maren S. Allopregnanolone in the bed nucleus of the stria  
463 terminalis modulates contextual fear in rats. *Front Behav Neurosci.* 2015;9: 205.  
464 doi:10.3389/fnbeh.2015.00205
- 465 40. Giustino TF, Ramanathan KR, Totty MS, Miles OW, Maren S. Locus Coeruleus  
466 Norepinephrine Drives Stress-Induced Increases in Basolateral Amygdala Firing and  
467 Impairs Extinction Learning. *J Neurosci.* 2020;40: 907–916.  
468 doi:10.1523/JNEUROSCI.1092-19.2019
- 469 41. Totty MS, Payne MR, Maren S. Event boundaries do not cause the immediate extinction  
470 deficit after Pavlovian fear conditioning in rats. *Sci Rep.* 2019;9: 9459.  
471 doi:10.1038/s41598-019-46010-4
- 472 42. Giustino TF, Seemann JR, Acca GM, Goode TD, Fitzgerald PJ, Maren S.  $\beta$ -  
473 Adrenoceptor Blockade in the Basolateral Amygdala, But Not the Medial Prefrontal  
474 Cortex, Rescues the Immediate Extinction Deficit. *Neuropsychopharmacology.* 2017;42:  
475 2537–2544. doi:10.1038/npp.2017.89
- 476 43. McCall JG, Siuda ER, Bhatti DL, Lawson LA, McElligott ZA, Stuber GD, et al. Locus  
477 coeruleus to basolateral amygdala noradrenergic projections promote anxiety-like  
478 behavior. *eLife.* 2017;6. doi:10.7554/eLife.18247
- 479 44. Fitzgerald PJ, Giustino TF, Seemann JR, Maren S. Noradrenergic blockade stabilizes  
480 prefrontal activity and enables fear extinction under stress. *Proc Natl Acad Sci USA.*  
481 2015;112: E3729–37. doi:10.1073/pnas.1500682112
- 482 45. Kim SC, Jo YS, Kim IH, Kim H, Choi J-S. Lack of medial prefrontal cortex activation  
483 underlies the immediate extinction deficit. *J Neurosci.* 2010;30: 832–837.  
484 doi:10.1523/JNEUROSCI.4145-09.2010
- 485 46. Hong J, Kim D. Freezing response-independent facilitation of fear extinction memory in  
486 the prefrontal cortex. *Sci Rep.* 2017;7: 5363. doi:10.1038/s41598-017-04335-y
- 487 47. Do-Monte FH, Manzano-Nieves G, Quiñones-Laracuenta K, Ramos-Medina L, Quirk  
488 GJ. Revisiting the role of infralimbic cortex in fear extinction with optogenetics. *J*  
489 *Neurosci.* 2015;35: 3607–3615. doi:10.1523/JNEUROSCI.3137-14.2015
- 490 48. Quirk GJ, Mueller D. Neural mechanisms of extinction learning and retrieval.  
491 *Neuropsychopharmacology.* 2008;33: 56–72. doi:10.1038/sj.npp.1301555
- 492 49. Maren S, Quirk GJ. Neuronal signalling of fear memory. *Nat Rev Neurosci.* 2004;5: 844–  
493 852. doi:10.1038/nrn1535
- 494 50. Uematsu A, Tan BZ, Ycu EA, Cuevas JS, Koivumaa J, Junyent F, et al. Modular  
495 organization of the brainstem noradrenaline system coordinates opposing learning states.  
496 *Nat Neurosci.* 2017;20: 1602–1611. doi:10.1038/nn.4642

- 497 51. Snyder K, Wang W-W, Han R, McFadden K, Valentino RJ. Corticotropin-releasing  
498 factor in the norepinephrine nucleus, locus coeruleus, facilitates behavioral flexibility.  
499 *Neuropsychopharmacology*. 2012;37: 520–530. doi:10.1038/npp.2011.218
- 500 52. Mulvey B, Bhatti DL, Gyawali S, Lake AM, Kriaucionis S, Ford CP, et al. Molecular and  
501 functional sex differences of noradrenergic neurons in the mouse locus coeruleus. *Cell*  
502 *Rep*. 2018;23: 2225–2235. doi:10.1016/j.celrep.2018.04.054
- 503 53. Bangasser DA, Zhang X, Garachh V, Hanhauser E, Valentino RJ. Sexual dimorphism in  
504 locus coeruleus dendritic morphology: a structural basis for sex differences in emotional  
505 arousal. *Physiol Behav*. 2011;103: 342–351. doi:10.1016/j.physbeh.2011.02.037
- 506 54. Curtis AL, Bethea T, Valentino RJ. Sexually dimorphic responses of the brain  
507 norepinephrine system to stress and corticotropin-releasing factor.  
508 *Neuropsychopharmacology*. 2006;31: 544–554. doi:10.1038/sj.npp.1300875
- 509 55. McCall JG, Al-Hasani R, Siuda ER, Hong DY, Norris AJ, Ford CP, et al. CRH  
510 Engagement of the Locus Coeruleus Noradrenergic System Mediates Stress-Induced  
511 Anxiety. *Neuron*. 2015;87: 605–620. doi:10.1016/j.neuron.2015.07.002
- 512 56. Van Bockstaele EJ, Colago EE, Valentino RJ. Amygdaloid corticotropin-releasing factor  
513 targets locus coeruleus dendrites: substrate for the co-ordination of emotional and  
514 cognitive limbs of the stress response. *J Neuroendocrinol*. 1998;10: 743–757.  
515 doi:10.1046/j.1365-2826.1998.00254.x
- 516 57. Valentino RJ, Rudoy C, Saunders A, Liu XB, Van Bockstaele EJ. Corticotropin-releasing  
517 factor is preferentially colocalized with excitatory rather than inhibitory amino acids in  
518 axon terminals in the peri-locus coeruleus region. *Neuroscience*. 2001;106: 375–384.  
519 doi:10.1016/s0306-4522(01)00279-2
- 520 58. Reyes BAS, Drolet G, Van Bockstaele EJ. Dynorphin and stress-related peptides in rat  
521 locus coeruleus: contribution of amygdalar efferents. *J Comp Neurol*. 2008;508: 663–675.  
522 doi:10.1002/cne.21683
- 523 59. Bouret S, Duvel A, Onat S, Sara SJ. Phasic activation of locus ceruleus neurons by the  
524 central nucleus of the amygdala. *J Neurosci*. 2003;23: 3491–3497.
- 525 60. Jo YS, Namboodiri VMK, Stuber GD, Zweifel LS. Persistent activation of central  
526 amygdala CRF neurons helps drive the immediate fear extinction deficit. *Nat Commun*.  
527 2020;11: 422. doi:10.1038/s41467-020-14393-y
- 528 61. Curtis AL, Pavcovich LA, Grigoriadis DE, Valentino RJ. Previous stress alters  
529 corticotropin-releasing factor neurotransmission in the locus coeruleus. *Neuroscience*.  
530 1995;65: 541–550. doi:10.1016/0306-4522(94)00496-r

- 531 62. Curtis AL, Pavcovich LA, Valentino RJ. Long-term regulation of locus ceruleus  
532 sensitivity to corticotropin-releasing factor by swim stress. *J Pharmacol Exp Ther.*  
533 1999;289: 1211–1219.
- 534 63. Myers KM, Ressler KJ, Davis M. Different mechanisms of fear extinction dependent on  
535 length of time since fear acquisition. *Learn Mem.* 2006;13: 216–223.  
536 doi:10.1101/lm.119806
- 537 64. Bouchet CA, Lloyd BA, Loetz EC, Farmer CE, Ostrovskyy M, Haddad N, et al. Acute  
538 exercise enhances the consolidation of fear extinction memory and reduces conditioned  
539 fear relapse in a sex-dependent manner. *Learn Mem.* 2017;24: 358–368.  
540 doi:10.1101/lm.045195.117
- 541 65. Hilz EN, Smith RW, Hong YJ, Monfils MH, Lee HJ. Mapping the estrous cycle to  
542 context-specific extinction memory. *Behav Neurosci.* 2019;133: 614–623.  
543 doi:10.1037/bne0000343
- 544 66. Hilz EN, Agee LA, Jun D, Monfils MH, Lee HJ. Expression patterns of Arc mRNA after  
545 renewal of appetitive behavior in female rats. *BioRxiv.* 2021.  
546 doi:10.1101/2021.07.20.453088
- 547 67. Park CHJ, Ganella DE, Kim JH. Context fear learning and renewal of extinguished fear  
548 are dissociated in juvenile female rats. *Dev Psychobiol.* 2020;62: 123–129.  
549 doi:10.1002/dev.21888
- 550 68. Park CHJ, Ganella DE, Kim JH. Juvenile female rats, but not male rats, show renewal,  
551 reinstatement, and spontaneous recovery following extinction of conditioned fear. *Learn*  
552 *Mem.* 2017;24: 630–636. doi:10.1101/lm.045831.117
- 553 69. Adkins JM, Lynch J, Gray M, Jasnow AM. Presynaptic GABAB receptor inhibition sex  
554 dependently enhances fear extinction and attenuates fear renewal. *Psychopharmacology*  
555 *(Berl).* 2021. doi:10.1007/s00213-021-05831-w
- 556 70. Rescorla RA. Spontaneous recovery. *Learn Mem.* 2004;11: 501–509.  
557 doi:10.1101/lm.77504
- 558 71. Li W-G, Wu Y-J, Gu X, Fan H-R, Wang Q, Zhu J-J, et al. Input associativity underlies  
559 fear memory renewal. *Natl Sci Rev.* 2021;8: nwab004. doi:10.1093/nsr/nwab004
- 560 72. Xu C, Krabbe S, Gründemann J, Botta P, Fadok JP, Osakada F, et al. Distinct  
561 hippocampal pathways mediate dissociable roles of context in memory retrieval. *Cell.*  
562 2016;167: 961-972.e16. doi:10.1016/j.cell.2016.09.051
- 563 73. Marek R, Jin J, Goode TD, Giustino TF, Wang Q, Acca GM, et al. Hippocampus-driven  
564 feed-forward inhibition of the prefrontal cortex mediates relapse of extinguished fear. *Nat*  
565 *Neurosci.* 2018;21: 384–392. doi:10.1038/s41593-018-0073-9

- 566 74. Jin J, Maren S. Fear renewal preferentially activates ventral hippocampal neurons  
567 projecting to both amygdala and prefrontal cortex in rats. *Sci Rep.* 2015;5: 8388.  
568 doi:10.1038/srep08388
- 569 75. Anderson LC, Petrovich GD. Distinct recruitment of the hippocampal, thalamic, and  
570 amygdalar neurons projecting to the prelimbic cortex in male and female rats during  
571 context-mediated renewal of responding to food cues. *Neurobiol Learn Mem.* 2018;150:  
572 25–35. doi:10.1016/j.nlm.2018.02.013
- 573 76. Anderson LC, Petrovich GD. Ventromedial prefrontal cortex mediates sex differences in  
574 persistent cognitive drive for food. *Sci Rep.* 2018;8: 2230. doi:10.1038/s41598-018-  
575 20553-4
- 576 77. Anderson LC, Petrovich GD. Sex specific recruitment of a medial prefrontal cortex-  
577 hippocampal-thalamic system during context-dependent renewal of responding to food  
578 cues in rats. *Neurobiol Learn Mem.* 2017;139: 11–21. doi:10.1016/j.nlm.2016.12.004
- 579 78. Namkung H, Kim S-H, Sawa A. The insula: an underestimated brain area in clinical  
580 neuroscience, psychiatry, and neurology. *Trends Neurosci.* 2017;40: 200–207.  
581 doi:10.1016/j.tins.2017.02.002

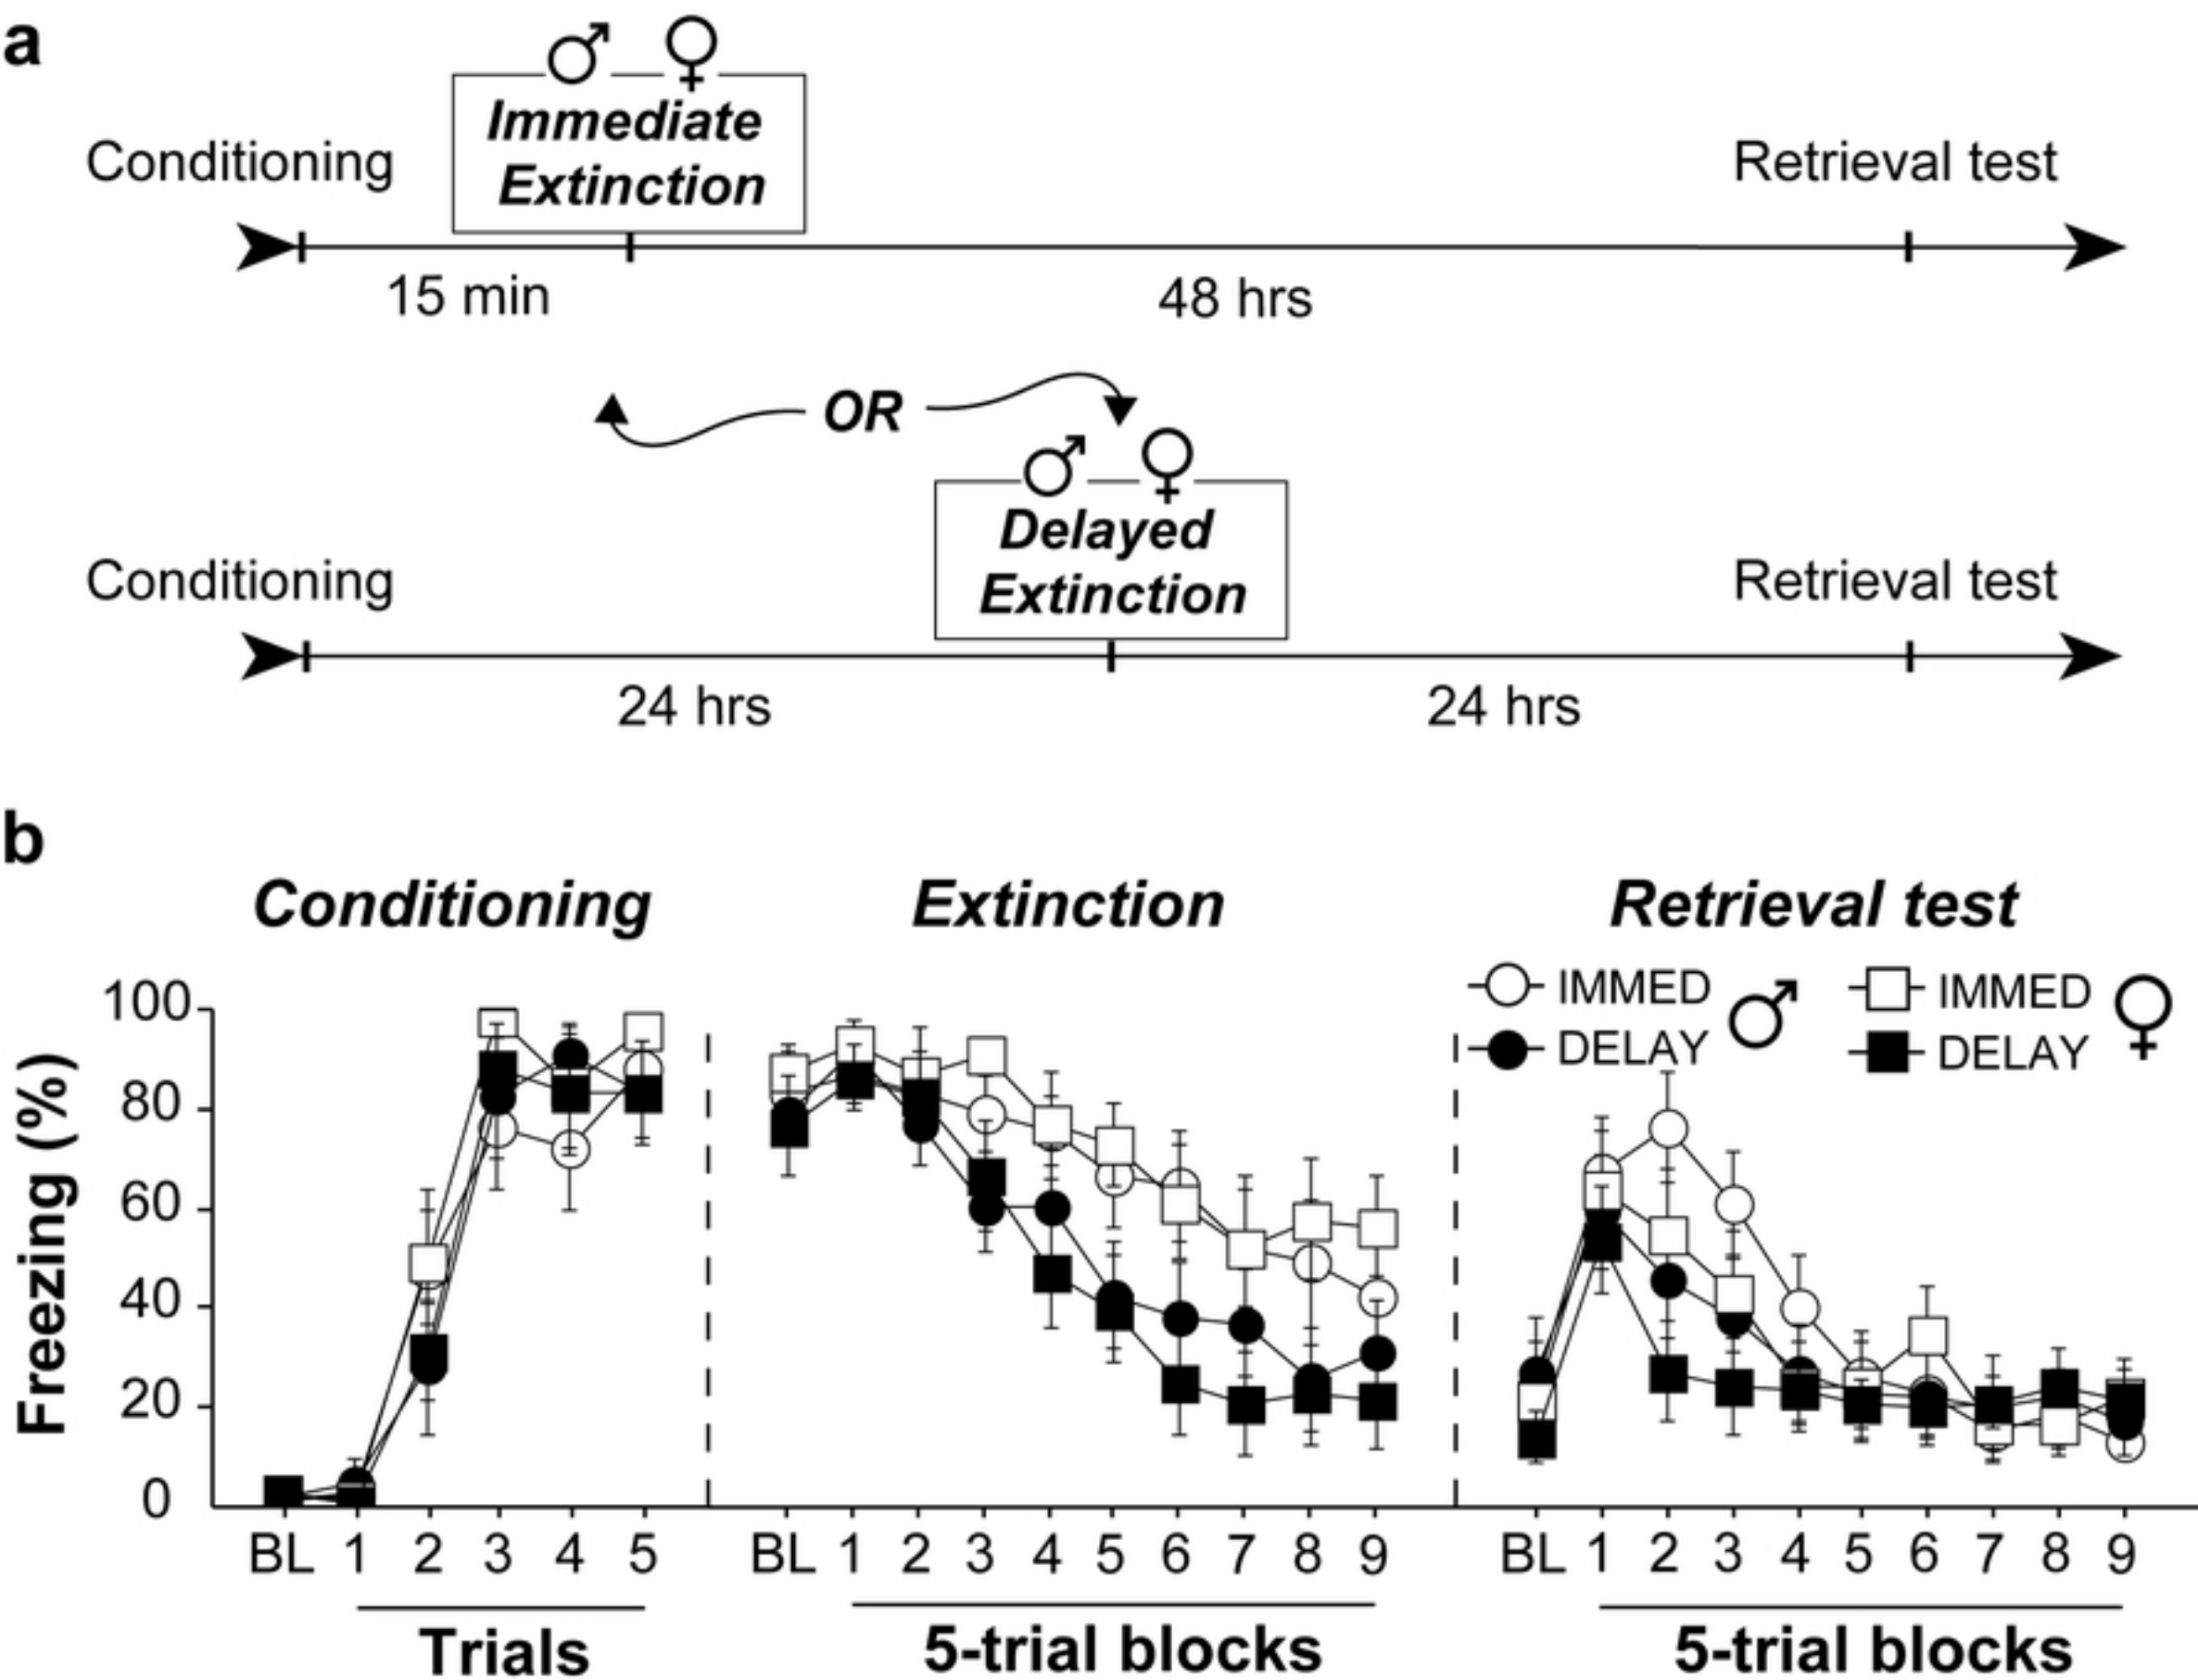

Figure 1



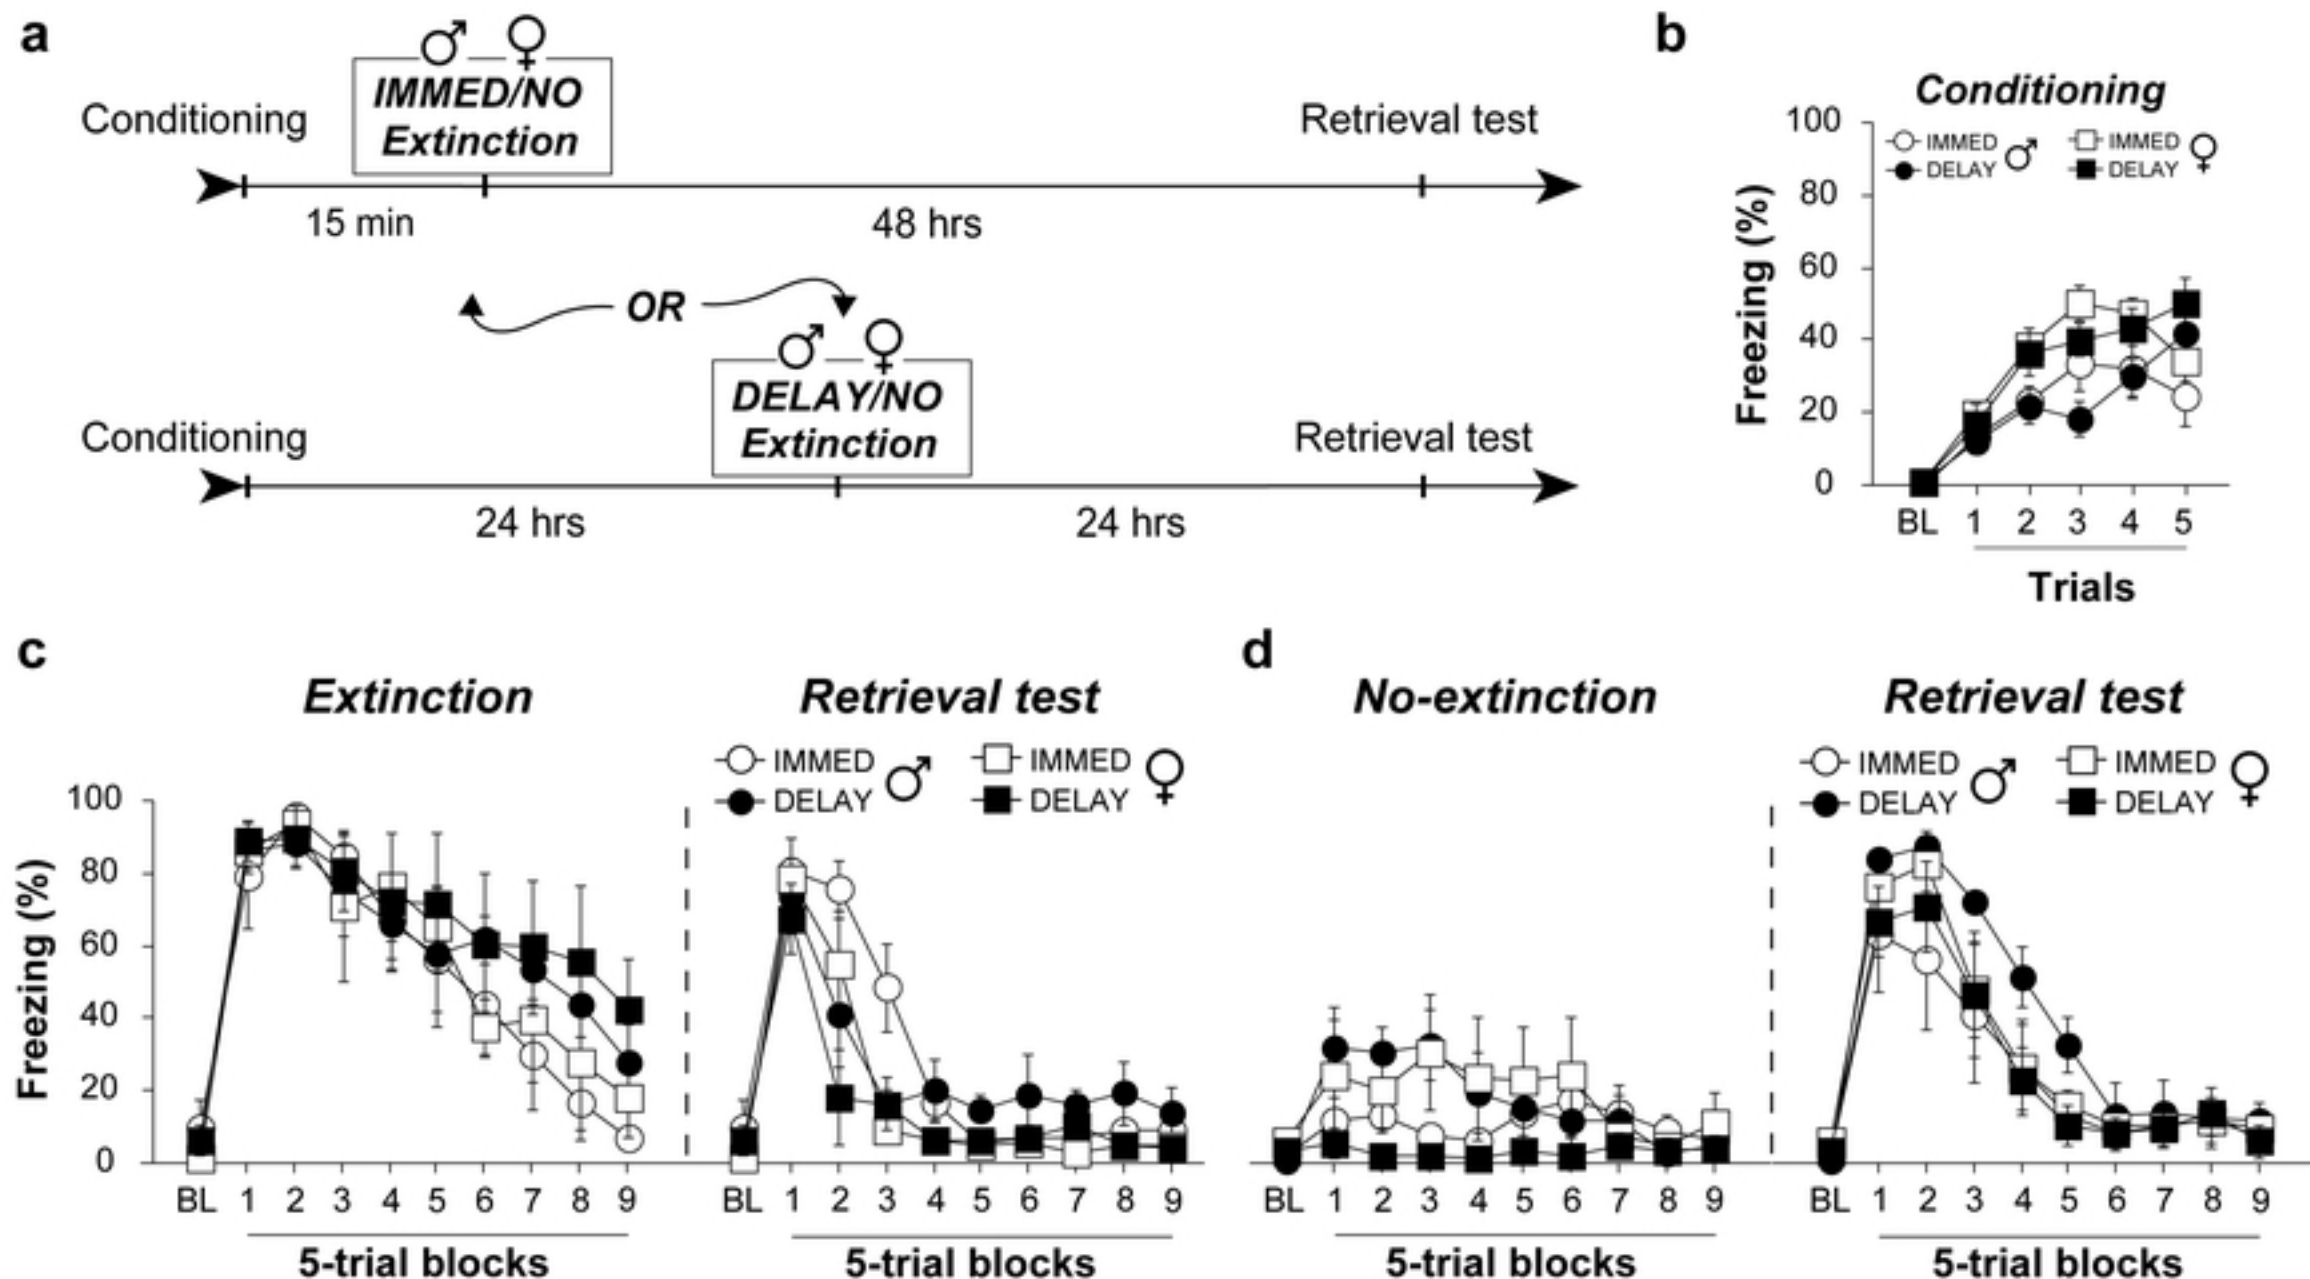

Figure 2

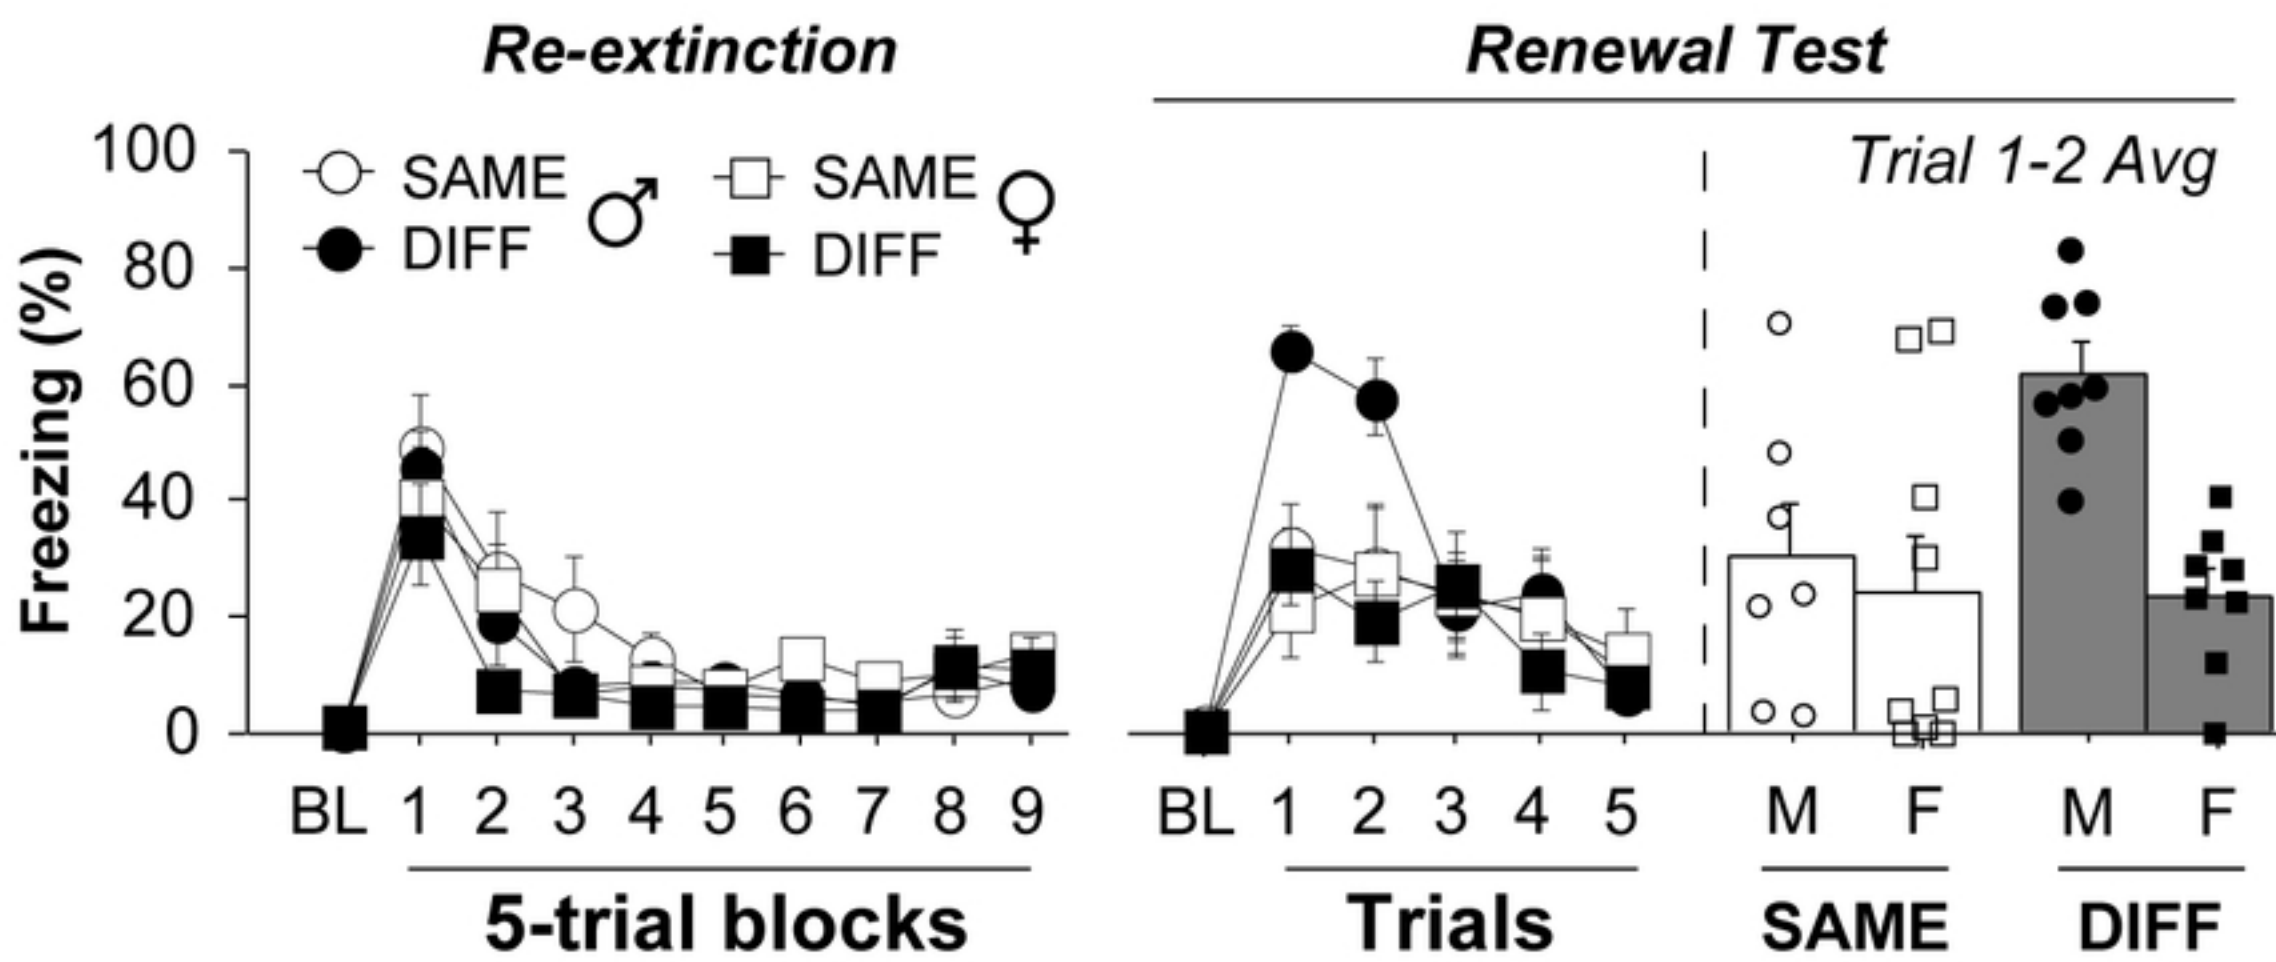

Figure 3
